# Supplementary material for: Clinical, pathological and treatment factors associated with the survival of patients with pulmonary sarcomatoid carcinoma
Source: PubMed Central journal article supplement — Oncol Lett. 2020 Mar 23;19(6):4031–9. doi: 10.3892/ol.2020.11472 (PMC7202303; doi:10.3892/ol.2020.11472), 2020-03-23

Figure S1. Kaplan-Meier survival curves of stage I-III patients with pulmonary sarcomatoid carcinoma receiving only radiotherapy stratified according to different American Joint Committee on Cancer versions. (A) 3rd, (B) 6th and (C) 7th.

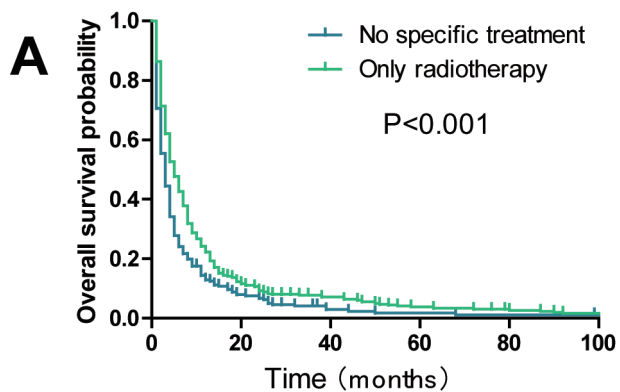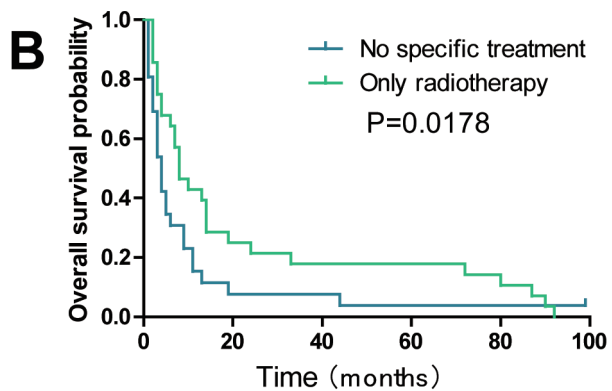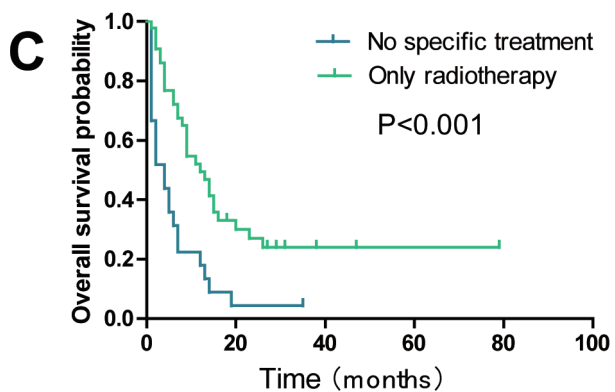

Supplement: Supplementary_Data.pdf [file Supplementary_Data.pdf]
